# Supplementary material for: UV induced proton transfer in thioacetamide: first observation of thiol form of simple thioamideElectronic supplementary information (ESI): Tables S1 and S2 provide internal coordinates used in the normal mode analysis for the thione and thiol tautomers of thioacetamide. Atom numbering is given in Scheme S1. Infrared spectra of thioacetamide isolated in N2 and Ar matrices are compared in Figs. S1 and S2 with the spectra theoretically predicted at the DFT level. Table S3 provides the assignment of the bands observed in the IR spectra of thioacetamide (thione form) isolated in Ar and N2 matrices. The theoretically calculated spectra of four conformers of thioacetamide in the thiol tautomeric form are presented in Tables S4–S7. Optimised geometries of thioacetamide isomers are given in Table S8 and the relative energies calculated for these isomers are presented in Table S9. See http://www.rsc.org/suppdata/cp/b3/b300793f/
Source: Royal Society of Chemistry journal article supplement (doi:10.1039/b300793f), 2003-03-07
Supplement: esi_b300793f.pdf [file esi_b300793f.pdf]

**Electronic Supplementary Information:**

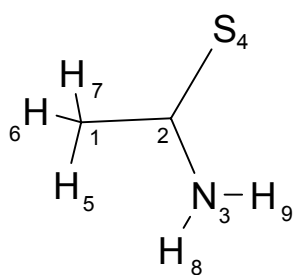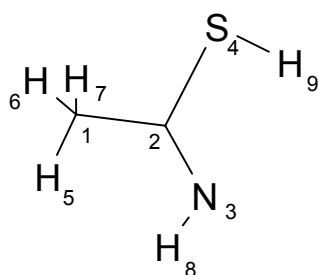

Scheme S1. Atom numbering for thione and thiol tautomers of thioacetamide

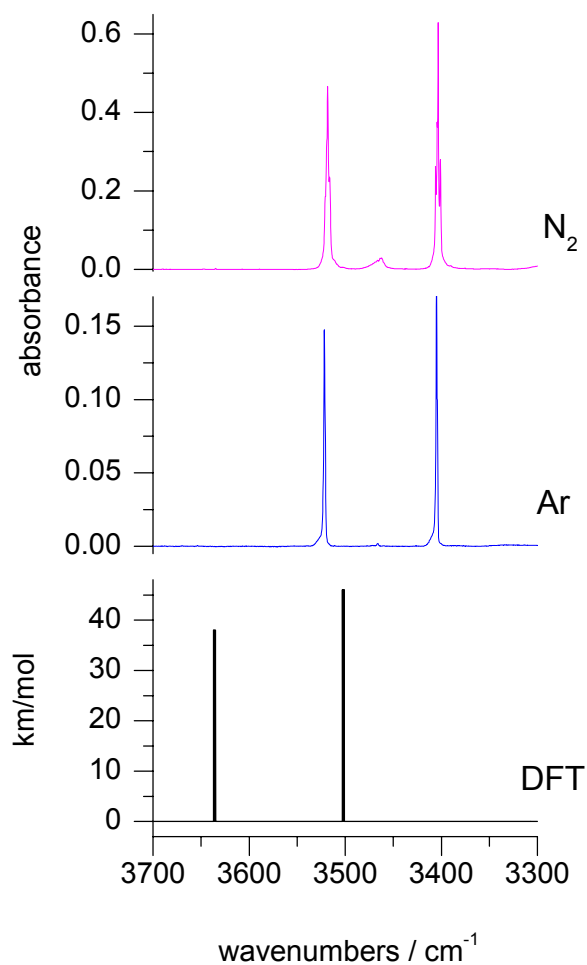

Figure S1

High frequency region of the infrared spectra of thioacetamide isolated in Ar and  $\text{N}_2$  matrices compared with the spectrum calculated theoretically for the thione-amino tautomer **I**. Baseline of the experimental spectra was corrected; theoretical spectra were calculated at the DFT(B3LYP)/6-31++G(d,p) level, and theoretical frequencies scaled by 0.98.

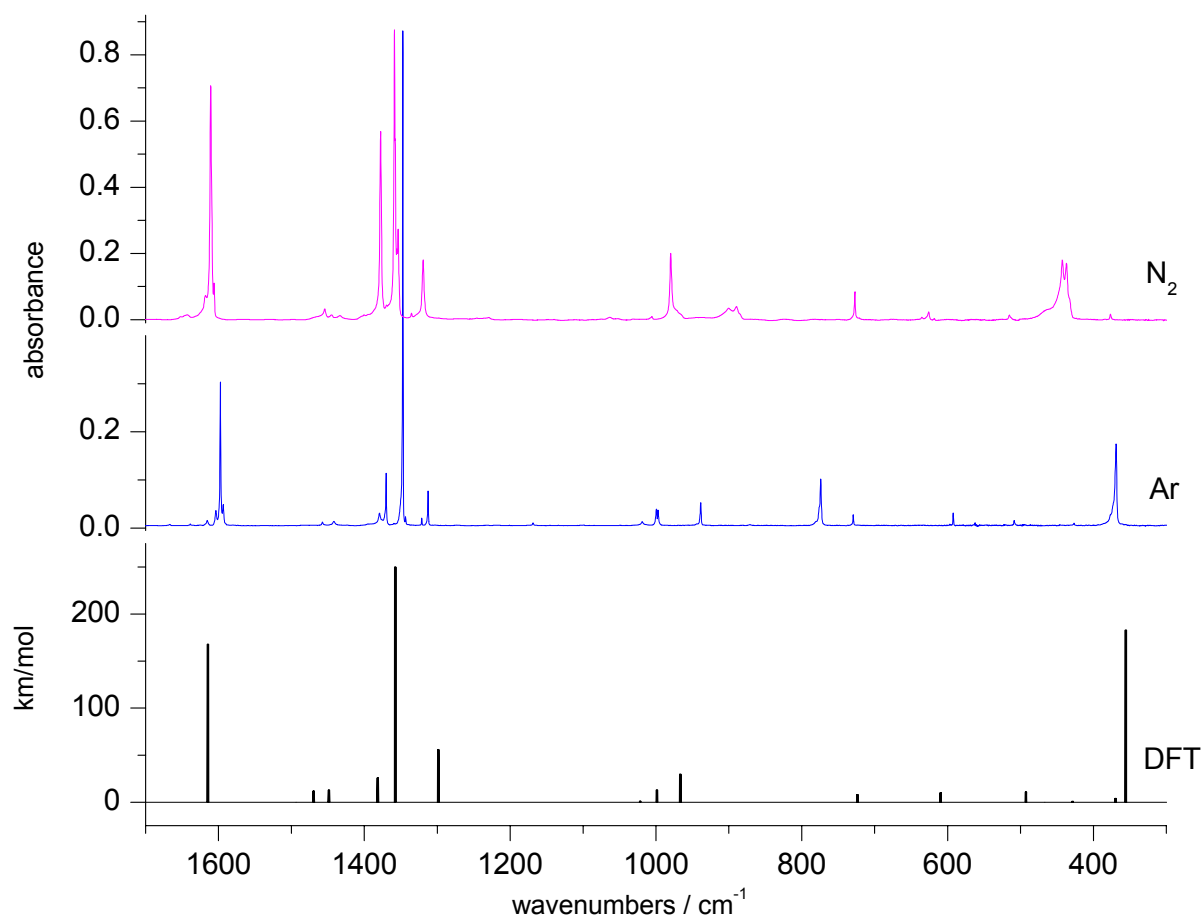

Figure S2.

The infrared spectra of thioacetamide isolated in Ar and  $\text{N}_2$  matrices compared with the spectrum calculated theoretically for the thione-amino tautomer **I**. Baseline of the experimental spectra was corrected; theoretical spectra were calculated at the DFT(B3LYP)/6-31++G(d,p) level, and theoretical frequencies scaled by 0.98.

Table S1.

Internal coordinates used in the normal mode analysis for the thione tautomer of thioacetamide.

Atom numbering as in Scheme S1.

|                                                                                                                           |                          |
|---------------------------------------------------------------------------------------------------------------------------|--------------------------|
| $S_1=(2^{-1/2})(r_{3,9} + r_{3,8})$                                                                                       | $\nu_s\text{NH}_2$       |
| $S_2=(2^{-1/2})(r_{3,9} - r_{3,8})$                                                                                       | $\nu_a\text{NH}_2$       |
| $S_3=r_{3,2}$                                                                                                             | $\nu\text{ CN}$          |
| $S_4=r_{2,4}$                                                                                                             | $\nu\text{ C=S}$         |
| $S_5=r_{2,1}$                                                                                                             | $\nu\text{ CC}$          |
| $S_6=(3^{-1/2})(r_{1,7} + r_{1,6} + r_{1,5})$                                                                             | $\nu\text{ Me1}$         |
| $S_7=(6^{-1/2})(2r_{1,5} - r_{1,7} - r_{1,6})$                                                                            | $\nu\text{ Me2}$         |
| $S_8=(2^{-1/2})(r_{1,7} - r_{1,6})$                                                                                       | $\nu\text{ Me3}$         |
| $S_9=(6^{-1/2})(2\beta_{8,9,3} - \beta_{8,2,3} - \beta_{9,2,3})$                                                          | $\text{NH}_2\text{scis}$ |
| $S_{10}=(2^{-1/2})(\beta_{8,2,3} - \beta_{9,2,3})$                                                                        | $\text{NH}_2\text{rock}$ |
| $S_{11}=(6^{-1/2})(2\beta_{3,1,2} - \beta_{3,4,2} - \beta_{1,4,2})$                                                       | $\beta\text{ CCN}$       |
| $S_{12}=(2^{-1/2})(\beta_{3,4,2} - \beta_{1,4,2})$                                                                        | $\beta\text{ C=S}$       |
| $S_{13}=(12^{-1/2})(\beta_{7,5,1} + \beta_{7,6,1} + \beta_{5,6,1} - \beta_{7,2,1} - \beta_{5,2,1} - \beta_{6,2,1})$       | $\beta\text{ Me1}$       |
| $S_{14}=(6^{-1/2})(2\beta_{7,6,1} - \beta_{7,5,1} - \beta_{6,5,1})$                                                       | $\beta\text{ Me2}$       |
| $S_{15}=(2^{-1/2})(\beta_{7,5,1} - \beta_{6,5,1})$                                                                        | $\beta\text{ Me3}$       |
| $S_{16}=(6^{-1/2})(2\beta_{5,2,1} - \beta_{7,2,1} - \beta_{6,2,1})$                                                       | $\beta\text{ Me4}$       |
| $S_{17}=(2^{-1/2})(\beta_{7,2,1} - \beta_{6,2,1})$                                                                        | $\beta\text{ Me5}$       |
| $S_{18}=(12^{-1/2})(\tau_{5,1,2,4} + \tau_{5,1,2,3} + \tau_{6,1,2,4} + \tau_{6,1,2,3} + \tau_{7,1,2,4} + \tau_{7,1,2,3})$ | $\tau\text{ Me}$         |
| $S_{19}=1/2(\tau_{8,3,2,4} + \tau_{8,3,2,1} + \tau_{9,3,2,4} + \tau_{9,3,2,1})$                                           | $\tau\text{ NH}_2$       |
| $S_{20}=\gamma_{2,8,3,9}$                                                                                                 | $\text{NH}_2\text{inv}$  |
| $S_{21}=\gamma_{4,3,2,1}$                                                                                                 | $\gamma\text{ C=S}$      |

$r_{ij}$  is the distance between atoms  $A_i$  and  $A_j$ ;  $\beta_{i,j,k}$  is the angle between vectors  $A_kA_i$  and  $A_kA_j$ ;  $\tau_{i,j,k,l}$  is the dihedral angle between the plane defined by atoms  $A_i, A_j, A_k$  and the plane defined by  $A_j, A_k, A_l$ ;  $\gamma_{i,j,k,l}$  is the angle between the vector  $A_kA_i$  and the plane defined by atoms  $A_j, A_k, A_l$ .

Table S2.

Internal coordinates used in the normal mode analysis for the thiol tautomer of thioacetamide.

Atom numbering as in Scheme S1.

|                                                                                                                           |             |
|---------------------------------------------------------------------------------------------------------------------------|-------------|
| $S_1=r_{3,8}$                                                                                                             | $\nu$ NH    |
| $S_2=r_{4,9}$                                                                                                             | $\nu$ SH    |
| $S_3=r_{2,3}$                                                                                                             | $\nu$ C=N   |
| $S_4=r_{4,2}$                                                                                                             | $\nu$ CS    |
| $S_5=r_{2,1}$                                                                                                             | $\nu$ CC    |
| $S_6=(3^{-1/2})(r_{1,7} + r_{1,6} + r_{1,5})$                                                                             | $\nu$ Me1   |
| $S_7=(6^{-1/2})(2r_{1,5} - r_{1,7} - r_{1,6})$                                                                            | $\nu$ Me2   |
| $S_8=(2^{-1/2})(r_{1,7} - r_{1,6})$                                                                                       | $\nu$ Me3   |
| $S_9=\beta_{7,2,3}$                                                                                                       | $\beta$ NH  |
| $S_{10}=(6^{-1/2})(2\beta_{3,1,2} - \beta_{4,3,2} - \beta_{1,4,2})$                                                       | $\beta$ CCN |
| $S_{11}=\beta_{9,2,4}$                                                                                                    | $\beta$ SH  |
| $S_{12}=(2^{-1/2})(\beta_{4,1,2} - \beta_{4,3,2})$                                                                        | $\beta$ CS  |
| $S_{13}=(12^{-1/2})(\beta_{7,5,1} + \beta_{7,6,1} + \beta_{5,6,1} - \beta_{7,2,1} - \beta_{5,2,1} - \beta_{6,2,1})$       | $\beta$ Me1 |
| $S_{14}=(6^{-1/2})(2\beta_{7,6,1} - \beta_{7,5,1} - \beta_{6,5,1})$                                                       | $\beta$ Me2 |
| $S_{15}=(2^{-1/2})(\beta_{7,5,1} - \beta_{6,5,1})$                                                                        | $\beta$ Me3 |
| $S_{16}=(6^{-1/2})(2\beta_{5,2,1} - \beta_{7,2,1} - \beta_{6,2,1})$                                                       | $\beta$ Me4 |
| $S_{17}=(2^{-1/2})(\beta_{7,2,1} - \beta_{6,2,1})$                                                                        | $\beta$ Me5 |
| $S_{18}=(12^{-1/2})(\tau_{7,1,2,4} + \tau_{7,1,2,3} + \tau_{5,1,2,4} + \tau_{5,1,2,3} + \tau_{6,1,2,4} + \tau_{6,1,2,3})$ | $\tau$ Me   |
| $S_{19}=(2^{-1/2})(\tau_{8,3,2,4} + \tau_{8,3,2,1})$                                                                      | $\tau$ NH   |
| $S_{20}=(2^{-1/2})(\tau_{9,4,2,1} + \tau_{9,4,2,3})$                                                                      | $\tau$ SH   |
| $S_{21}=\gamma_{4,1,2,3}$                                                                                                 | $\gamma$ CS |

$r_{i,j}$  is the distance between atoms  $A_i$  and  $A_j$ ;  $\beta_{i,j,k}$  is the angle between vectors  $A_kA_i$  and  $A_kA_j$ ;  $\tau_{i,j,k,l}$  is the dihedral angle between the plane defined by atoms  $A_i, A_j, A_k$  and the plane defined by  $A_j, A_k, A_l$ ;  $\gamma_{i,j,k,l}$  is the angle between the vector  $A_kA_i$  and the plane defined by atoms  $A_j, A_k, A_l$ .

Table S3. Experimental wavenumbers ( $\tilde{\nu}$  /  $\text{cm}^{-1}$ ) and relative integral intensities ( $I$ ) of the absorption bands in the spectrum of matrix isolated thioacetamide, compared with wavenumbers ( $\tilde{\nu}$  /  $\text{cm}^{-1}$ ), absolute intensities ( $A^{\text{th}}$  /  $\text{km}\cdot\text{mol}^{-1}$ ) and potential energy distribution (PED / %) theoretically calculated for the thione form **I**.

| experimental               |     |                                    |     | calculated                 |                 |                                                                               |
|----------------------------|-----|------------------------------------|-----|----------------------------|-----------------|-------------------------------------------------------------------------------|
| Ar matrix                  |     | N <sub>2</sub> matrix              |     | DFT(B3LYP)/6-31++G(d,p)    |                 |                                                                               |
| $\tilde{\nu}$ <sup>a</sup> | $I$ | $\tilde{\nu}$ <sup>a</sup>         | $I$ | $\tilde{\nu}$ <sup>b</sup> | $A^{\text{th}}$ | PED                                                                           |
| 3521                       | 67  | <u>3521</u><br><u>3518</u><br>3510 | 100 | 3636                       | 38              | $\nu_{\text{a}}\text{NH}_2(100)$                                              |
| 3466                       | 1   | 3463                               | 16  |                            |                 |                                                                               |
| 3405                       | 71  | 3406 sh<br><u>3404</u>             | 101 | 3502                       | 46              | $\nu_{\text{s}}\text{NH}_2(100)$                                              |
| 3404                       | sh  | 3401 sh                            |     |                            |                 |                                                                               |
| 3288                       | 4   | 3288                               |     |                            |                 |                                                                               |
| 3176                       | 2   | 3201                               | 5   |                            |                 |                                                                               |
| 2964                       | 5   | 2966                               | 4   | 3041                       | 16              | $\nu$ Me3(99)                                                                 |
| 2925                       | 6   | 2926                               | 8   | 2979                       | 23              | $\nu$ Me1(91)                                                                 |
| 1624                       |     |                                    |     |                            |                 |                                                                               |
| 1615                       |     |                                    |     |                            |                 |                                                                               |
| 1608                       |     |                                    |     |                            |                 |                                                                               |
| 1603                       |     | 1617                               |     |                            |                 |                                                                               |
| <u>1597</u>                | 158 | <u>1610</u>                        | 143 | 1614                       | 168             | $\text{NH}_2\text{scis}(90)$                                                  |
| <u>1593</u>                |     | <u>1605</u>                        |     |                            |                 |                                                                               |
| 1457                       | 3   | 1453                               | 4   | 1469                       | 12              | $\beta$ Me3(80)                                                               |
| 1441                       | 7   | 1443                               | 5   | 1448                       | 13              | $\beta$ Me2(83) $\beta$ Me4(10)                                               |
|                            |     | 1432                               | 6   |                            |                 |                                                                               |
| 1378                       |     |                                    |     |                            |                 |                                                                               |
| <u>1369</u>                | 68  | 1377                               | 111 | 1381                       | 26              | $\beta$ Me1(87)                                                               |
| <u>1347</u>                | 262 | <u>1358</u>                        | 179 | 1357                       | 250             | $\nu$ CN(54)                                                                  |
| 1343                       |     | 1353 sh                            |     |                            |                 |                                                                               |
| 1321                       |     |                                    |     |                            |                 |                                                                               |
| <u>1312</u>                | 24  | 1319                               | 4   | 1298                       | 56              | $\text{NH}_2\text{rock}(40)$ , $\nu$ CC(22), $\nu$ C=S(12)                    |
| 1168                       | 2   |                                    |     |                            |                 |                                                                               |
| 1018                       | 10  | 1005                               | 1   | 1021                       | 1               | $\beta$ Me5(42), $\beta$ Me4(36), $\gamma$ C=S(10)                            |
| <u>999</u>                 | 29  | 979                                | 51  | 998                        | 13              | $\beta$ Me4(39), $\beta$ Me5(30), $\text{NH}_2\text{rock}(13)$ , $\nu$ CN(12) |
| 997                        |     |                                    |     |                            |                 |                                                                               |
| 938                        | 20  | 899                                | 33  | 966                        | 30              | $\text{NH}_2\text{rock}(37)$ , $\nu$ CC(33), $\nu$ C=S(21)                    |
|                            |     | 887                                |     |                            |                 |                                                                               |
| 774                        | 66  |                                    |     |                            |                 | overtone of $\text{NH}_2\text{inv}$                                           |
| 729                        | 7   | 727                                | 10  | 723                        | 8               | $\nu$ C=S(49), $\nu$ CC(34), $\nu$ CN(10)                                     |
|                            |     | 637                                |     |                            |                 |                                                                               |
| 592                        | 6   | <u>625</u><br>618                  | 6   | 609                        | 10              | $\tau$ $\text{NH}_2(82)$                                                      |
| 508                        | 4   | 515                                | 2   | 492                        | 11              | $\gamma$ C=S(81)                                                              |
| 426                        | 2   |                                    |     | 428                        | 1               | $\beta$ CNN(66), $\beta$ C=S(19)                                              |
| 376                        | sh  | 376                                | 2   | 369                        | 4               | $\beta$ C=S(72), $\beta$ CCN(17)                                              |
| 368                        | 157 | 442                                | 139 | 355                        | 183             | $\text{NH}_2\text{inv}(90)$ , $\tau$ $\text{NH}_2(10)$                        |
|                            |     | 437                                |     |                            |                 |                                                                               |
|                            |     |                                    |     | 64                         | 1               | $\tau$ Me(99)                                                                 |

<sup>a</sup> Wavenumbers of the strongest bands are underlined.

<sup>b</sup> Theoretical frequencies have been scaled by 0.98. PED's lower than 10% are not included.

sh - shoulder

Table S4

Normal mode frequencies ( $\tilde{\nu}$ ), potential energy distribution (PED) and absolute intensities ( $A^{\text{th}}$ ) of the theoretically predicted (DFT(B3LYP)/6-31++G(d,p)) IR bands for the form **II** of the thiol tautomer of thioacetamide.

| mode<br>No. | $\tilde{\nu}^{\text{a}}$<br>cm <sup>-1</sup> | $A^{\text{th}}$<br>km·mol <sup>-1</sup> | PED <sup>b</sup><br>%                                        | approximate<br>assignment |
|-------------|----------------------------------------------|-----------------------------------------|--------------------------------------------------------------|---------------------------|
| Q1          | 3388                                         | 1                                       | $\nu$ NH(100)                                                | NH str                    |
| Q2          | 3071                                         | 14                                      | $\nu$ Me2(100)                                               | Me str                    |
| Q3          | 3053                                         | 5                                       | $\nu$ Me3(100)                                               | Me str                    |
| Q4          | 2985                                         | 7                                       | $\nu$ Me1(100)                                               | Me str                    |
| Q5          | 2641                                         | 1                                       | $\nu$ SH(100)                                                | SH str                    |
| Q6          | 1656                                         | 158                                     | $\nu$ C=N(87)                                                | C=N str                   |
| Q7          | 1457                                         | 23                                      | $\beta$ Me2(90)                                              | Me bend                   |
| Q8          | 1449                                         | 13                                      | $\beta$ Me3(95)                                              | Me bend                   |
| Q9          | 1383                                         | 18                                      | $\beta$ Me1(95)                                              | Me umbr                   |
| Q10         | 1270                                         | 61                                      | $\beta$ NH(65), $\beta$ CCN(11)                              | NH bend                   |
| Q11         | 1047                                         | 55                                      | $\beta$ Me4(55), $\beta$ NH(26)                              | Me rock                   |
| Q12         | 1042                                         | 5                                       | $\beta$ Me5(73), $\tau$ NH(11), $\gamma$ CS(85)              | Me rock                   |
| Q13         | 981                                          | 55                                      | $\beta$ SH(34), $\nu$ CC(30), $\beta$ Me4(11), $\nu$ C=N(10) | CC str, SH bend           |
| Q14         | 838                                          | 14                                      | $\beta$ SH(59), $\nu$ CC(29), $\beta$ Me4(10)                | SH bend                   |
| Q15         | 806                                          | 62                                      | $\tau$ NH(90)                                                | NH tors                   |
| Q16         | 626                                          | 52                                      | $\nu$ CS(60), $\beta$ CCN(17), $\nu$ CC(14)                  | CS str                    |
| Q17         | 488                                          | 1                                       | $\gamma$ CS(89), $\beta$ Me5(10)                             | CS wagg                   |
| Q18         | 441                                          | 8                                       | $\beta$ CCN(51), $\nu$ CS(27), $\beta$ CS(18)                | CCN bend, CS str          |
| Q19         | 332                                          | 25                                      | $\tau$ SH(96)                                                | SH tors                   |
| Q20         | 321                                          | 4                                       | $\beta$ CS(75), $\beta$ CCN(16)                              | CS bend                   |
| Q21         | 106                                          | 1                                       | $\tau$ Me(98)                                                | Me twist                  |

<sup>a</sup> Frequencies have been scaled by 0.98.

<sup>b</sup> Internal coordinates used in PED analysis are defined in Table S2. PED's lower than 10% not included.

Abbreviations: str - stretching; bend - bending; umbr - umbrella; rock - rocking; tors - torsion; wagg - wagging; twist - twisting.



Table S5

Normal mode frequencies ( $\tilde{\nu}$ ), potential energy distribution (PED) and absolute intensities ( $A^{\text{th}}$ ) of the theoretically predicted (DFT(B3LYP)/6-31++G(d,p)) IR bands for the form **III** of the thiol tautomer of thioacetamide.

| mode No. | $\tilde{\nu}^{\text{a}}$<br>cm <sup>-1</sup> | $A^{\text{th}}$<br>km·mol <sup>-1</sup> | PED <sup>b</sup><br>%                     | approximate assignment |
|----------|----------------------------------------------|-----------------------------------------|-------------------------------------------|------------------------|
| Q1       | 3402                                         | 1                                       | v NH(100)                                 | NH str                 |
| Q2       | 3066                                         | 17                                      | v Me2(100)                                | Me str                 |
| Q3       | 3051                                         | 6                                       | v Me3(100)                                | Me str                 |
| Q4       | 2982                                         | 8                                       | v Me1(100)                                | Me str                 |
| Q5       | 2639                                         | 8                                       | v SH(100)                                 | SH str                 |
| Q6       | 1659                                         | 179                                     | v C=N(88)                                 | C=N str                |
| Q7       | 1458                                         | 17                                      | $\beta$ Me2(90)                           | Me bend                |
| Q8       | 1450                                         | 13                                      | $\beta$ Me3(93)                           | Me bend                |
| Q9       | 1380                                         | 14                                      | $\beta$ Me1(96)                           | Me umbr                |
| Q10      | 1270                                         | 53                                      | $\beta$ NH(63), $\beta$ CCN(11)           | NH bend                |
| Q11      | 1041                                         | 70                                      | $\beta$ Me4(52), $\beta$ NH(28)           | Me rock                |
| Q12      | 1040                                         | 4                                       | $\beta$ Me5(73), $\tau$ NH(12)            | Me rock                |
| Q13      | 997                                          | 51                                      | $\beta$ SH(51), v CC(17), $\beta$ Me4(13) | CC str, SH bend        |
| Q14      | 885                                          | 14                                      | $\beta$ SH(44), v CC(39), $\beta$ Me4(10) | SH bend                |
| Q15      | 811                                          | 67                                      | $\tau$ NH(89)                             | NH tors                |
| Q16      | 628                                          | 51                                      | v CS(56), $\beta$ CCN(18), v CC(18)       | CS str                 |
| Q17      | 495                                          | 1                                       | $\gamma$ CS(87), $\beta$ Me5(10)          | CS wagg                |
| Q18      | 427                                          | 3                                       | $\beta$ CCN(55), v CS(30), $\beta$ CS(11) | CCN bend, CS str       |
| Q19      | 337                                          | 1                                       | $\beta$ CS(82), $\beta$ CCN(11)           | CS bend                |
| Q20      | 212                                          | 7                                       | $\tau$ SH(87)                             | SH tors                |
| Q21      | 150                                          | 1                                       | $\tau$ Me(92)                             | Me twist               |

<sup>a</sup> Frequencies have been scaled by 0.98.

<sup>b</sup> Internal coordinates used in PED analysis are defined in Table S2. PED's lower than 10% not included.

Abbreviations: str - stretching; bend - bending; umbr - umbrella; rock - rocking; tors - torsion; wagg - wagging; twist - twisting.

Table S6

Normal mode frequencies ( $\tilde{\nu}$ ), potential energy distribution (PED) and absolute intensities ( $A^{\text{th}}$ ) of the theoretically predicted (DFT(B3LYP)/6-31++G(d,p)) IR bands for the form **IV** of the thiol tautomer of thioacetamide.

| mode No. | $\tilde{\nu}^{\text{a}}$<br>cm <sup>-1</sup> | $A^{\text{th}}$<br>km·mol <sup>-1</sup> | PED <sup>b</sup><br>%                         | approximate assignment |
|----------|----------------------------------------------|-----------------------------------------|-----------------------------------------------|------------------------|
| Q1       | 3414                                         | 4                                       | $\nu$ NH(100)                                 | NH str                 |
| Q2       | 3098                                         | 4                                       | $\nu$ Me2(97)                                 | Me str                 |
| Q3       | 3050                                         | 6                                       | $\nu$ Me3(100)                                | Me str                 |
| Q4       | 2986                                         | 7                                       | $\nu$ Me1(96)                                 | Me str                 |
| Q5       | 2636                                         | 8                                       | $\nu$ SH(100)                                 | SH str                 |
| Q6       | 1670                                         | 152                                     | $\nu$ C=N(86)                                 | C=N str                |
| Q7       | 1455                                         | 15                                      | $\beta$ Me3(92)                               | Me bend                |
| Q8       | 1449                                         | 13                                      | $\beta$ Me2(92)                               | Me bend                |
| Q9       | 1382                                         | 17                                      | $\beta$ Me1(94)                               | Me umbr                |
| Q10      | 1236                                         | 233                                     | $\beta$ NH(65)                                | NH bend                |
| Q11      | 1057                                         | 29                                      | $\beta$ Me4(57), $\beta$ NH(17)               | Me rock                |
| Q12      | 1051                                         | 4                                       | $\beta$ Me5(75), $\tau$ NH(10)                | Me rock                |
| Q13      | 983                                          | 8                                       | $\nu$ CC(35), $\beta$ SH(31), $\beta$ NH(14)  | CC str, SH bend        |
| Q14      | 858                                          | 13                                      | $\beta$ SH(61), $\nu$ CC(29)                  | SH bend                |
| Q15      | 831                                          | 64                                      | $\tau$ NH(88)                                 | NH tors                |
| Q16      | 603                                          | 45                                      | $\nu$ CS(53), $\beta$ CCN(28), $\nu$ CC(10)   | CS str                 |
| Q17      | 482                                          | 3                                       | $\gamma$ CS(89), $\beta$ Me5(11)              | CS wagg                |
| Q18      | 436                                          | 15                                      | $\beta$ CCN(40), $\nu$ CS(37), $\beta$ CS(19) | CCN bend, CS str       |
| Q19      | 325                                          | 3                                       | $\beta$ CS(72), $\beta$ CCN(18)               | CS bend                |
| Q20      | 269                                          | 12                                      | $\tau$ SH(96)                                 | SH tors                |
| Q21      | 144                                          | 2                                       | $\tau$ Me(96)                                 | Me twist               |

<sup>a</sup> Frequencies have been scaled by 0.98.

<sup>b</sup> Internal coordinates used in PED analysis are defined in Table S2. PED's lower than 10% not included.

Abbreviations: str - stretching; bend - bending; umbr - umbrella; rock - rocking; tors - torsion; wagg - wagging; twist - twisting.

Table S7

Normal mode frequencies ( $\tilde{\nu}$ ), potential energy distribution (PED) and absolute intensities ( $A^{\text{th}}$ ) of the theoretically predicted (DFT(B3LYP)/6-31++G(d,p)) IR bands for the form **V** of the thiol tautomer of thioacetamide.

| mode No. | $\tilde{\nu}^{\text{a}}$<br>cm <sup>-1</sup> | $A^{\text{th}}$<br>km·mol <sup>-1</sup> | PED <sup>b</sup><br>%                                         | approximate assignment |
|----------|----------------------------------------------|-----------------------------------------|---------------------------------------------------------------|------------------------|
| Q1       | 3402                                         | 3                                       | $\nu$ NH(100)                                                 | NH str                 |
| Q2       | 3093                                         | 6                                       | $\nu$ Me2(97)                                                 | Me str                 |
| Q3       | 3048                                         | 8                                       | $\nu$ Me3(100)                                                | Me str                 |
| Q4       | 2986                                         | 8                                       | $\nu$ Me1(97)                                                 | Me str                 |
| Q5       | 2639                                         | 5                                       | $\nu$ SH(100)                                                 | SH str                 |
| Q6       | 1669                                         | 163                                     | $\nu$ C=N(86)                                                 | C=N str                |
| Q7       | 1457                                         | 15                                      | $\beta$ Me3(93)                                               | Me bend                |
| Q8       | 1449                                         | 9                                       | $\beta$ Me2(92)                                               | Me bend                |
| Q9       | 1380                                         | 15                                      | $\beta$ Me1(94)                                               | Me umbr                |
| Q10      | 1252                                         | 222                                     | $\beta$ NH(65)                                                | NH bend                |
| Q11      | 1053                                         | 27                                      | $\beta$ Me4(56), $\beta$ NH(20)                               | Me rock                |
| Q12      | 1050                                         | 5                                       | $\beta$ Me5(75), $\tau$ NH(12)                                | Me rock                |
| Q13      | 979                                          | 6                                       | $\nu$ CC(34), $\beta$ SH(25), $\beta$ Me4(14), $\beta$ NH(14) | CC str, SH bend        |
| Q14      | 861                                          | 9                                       | $\beta$ SH(68), $\nu$ CC(26)                                  | SH bend                |
| Q15      | 848                                          | 57                                      | $\tau$ NH(85)                                                 | NH tors                |
| Q16      | 606                                          | 37                                      | $\nu$ CS(53), $\beta$ CCN(26), $\nu$ CC(12)                   | CS str                 |
| Q17      | 485                                          | 4                                       | $\gamma$ CS(85), $\beta$ Me5(10)                              | CS wagg                |
| Q18      | 414                                          | 16                                      | $\beta$ CCN(49), $\nu$ CS(38)                                 | CCN bend, CS str       |
| Q19      | 332                                          | 1                                       | $\beta$ CS(83), $\beta$ CCN(10)                               | CS bend                |
| Q20      | 172                                          | 14                                      | $\tau$ Me(60),                                                | SH tors                |
| Q21      | 144                                          | 8                                       | $\tau$ SH(58), $\tau$ Me(40)                                  | Me twist               |

<sup>a</sup> Frequencies have been scaled by 0.98.

<sup>b</sup> Internal coordinates used in PED analysis are defined in Table S2. PED's lower than 10% not included.

Abbreviations: str - stretching; bend - bending; umbr - umbrella; rock - rocking; tors - torsion; wagg - wagging; twist - twisting.

Table S8.

Optimized geometries of thione and thiol isomers of thiourea obtained at MP2/6-31++G(d,p) level of calculation.

|                       | Isomers |        |        |        |        |
|-----------------------|---------|--------|--------|--------|--------|
|                       | I       | II     | III    | IV     | V      |
| Bond lengths (Å)      |         |        |        |        |        |
| C1 - C2               | 1.509   | 1.507  | 1.508  | 1.502  | 1.501  |
| C2 - N3               | 1.359   | 1.285  | 1.285  | 1.283  | 1.283  |
| C2 - S4               | 1.643   | 1.772  | 1.776  | 1.790  | 1.791  |
| N3 - H9               | 1.009   |        |        |        |        |
| S4 - H9               |         | 1.333  | 1.332  | 1.333  | 1.332  |
| N3 - H8               | 1.008   | 1.022  | 1.022  | 1.022  | 1.023  |
| C1 - H5               | 1.091   | 1.088  | 1.089  | 1.087  | 1.087  |
| C1 - H6               | 1.092   | 1.091  | 1.090  | 1.090  | 1.091  |
| C1 - H7               | 1.085   | 1.091  | 1.090  | 1.090  | 1.090  |
| Angles (deg)          |         |        |        |        |        |
| C1 - C2 - N3          | 113.4   | 127.1  | 126.8  | 120.0  | 120.1  |
| C1 - C2 - S4          | 123.7   | 113.3  | 117.2  | 112.3  | 116.9  |
| C2 - S4 - H9          |         | 94.1   | 96.0   | 96.0   | 96.6   |
| C2 - N3 - H9          | 118.7   |        |        |        |        |
| C2 - N3 - H8          | 120.9   | 109.3  | 109.5  | 112.2  | 111.7  |
| H8 - N3 - H9          | 117.9   |        |        |        |        |
| C2 - C1 - H6          | 109.8   | 110.4  | 110.7  | 110.5  | 110.8  |
| C2 - C1 - H5          | 110.6   | 110.1  | 109.9  | 108.5  | 108.4  |
| C2 - C1 - H7          | 110.1   | 110.4  | 110.3  | 110.5  | 110.4  |
| Dihedral angles (deg) |         |        |        |        |        |
| C1 - C2 - N3 - S4     | 178.8   | 180.0  | 177.7  | 180.0  | 177.0  |
| H8 - N3 - C2 - H9     | 161.7   |        |        |        |        |
| C1 - C2 - S4 - H9     |         | 180.0  | 10.1   | 180.0  | 18.3   |
| C1 - C2 - N3 - H8     | -10.6   | 0.0    | -0.4   | 180.0  | -179.9 |
| N3 - C2 - C1 - H6     | 73.4    | 120.4  | 124.9  | 120.2  | 124.5  |
| N3 - C2 - C1 - H5     | -46.1   | 0.0    | 4.7    | 120.2  | 4.3    |
| N3 - C2 - C1 - H7     | -167.0  | -120.4 | -115.4 | -120.2 | -115.8 |

Table S9.

Relative electronic ( $\Delta E_{\text{el}}$ ), zero-point vibrational ( $\Delta ZPE$ ), and total [ $\Delta E_{\text{tot}} = \Delta E_{\text{el}} + \Delta ZPE(\text{DFT})$ ] energies of thioacetamide isomers.

The energy of the thione-amino **I** form was taken as reference. The calculations were carried out with 6-31++G(d,p) basis set. All data in  $\text{kJ mol}^{-1}$ .

| Isomer                              | <b>II</b> | <b>III</b> | <b>IV</b> | <b>V</b> |
|-------------------------------------|-----------|------------|-----------|----------|
| $\Delta E_{\text{el}}(\text{MP2})$  | 48.3      | 57.3       | 48.5      | 49.7     |
| $\Delta E_{\text{el}}(\text{DFT})$  | 54.0      | 62.3       | 54.0      | 54.9     |
| $\Delta ZPE(\text{DFT})$            | -9.0      | -9.0       | -8.9      | -9.4     |
| $\Delta E_{\text{tot}}(\text{MP2})$ | 39.3      | 48.3       | 39.6      | 40.3     |
| $\Delta E_{\text{tot}}(\text{DFT})$ | 45.0      | 53.3       | 45.1      | 45.5     |
